# Supplementary material
Source: Springer Nature journal article supplement (https://www.springermedizin.de/resource/supplementary/12936_2009_1001_MOESM8_ESM.pdf/9548752)

Drug concentration

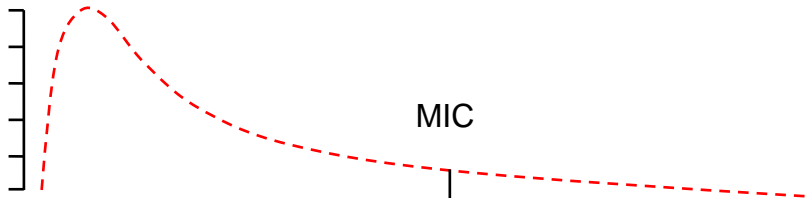

Total parasites

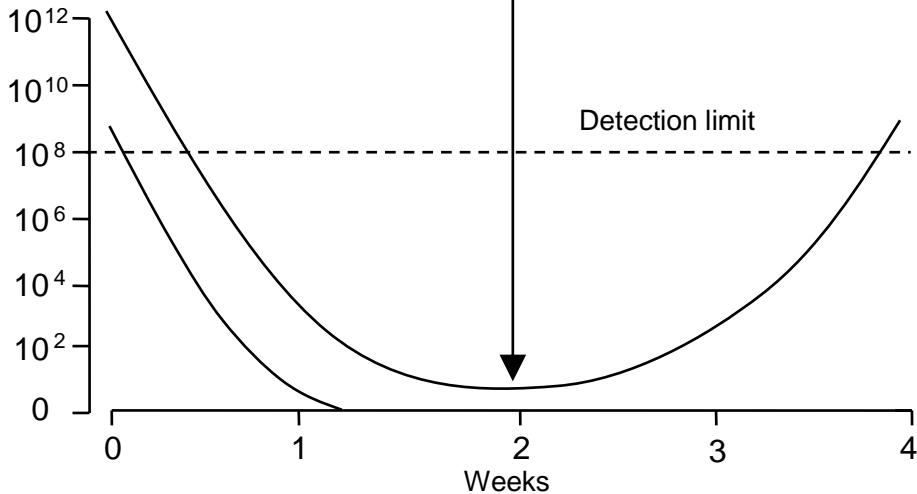

Supplement: MOESM8 [file 9548752]
